# Supplementary material for: Effort-Reward Imbalance, Over-Commitment and Depressive Episodes at Work: Evidence from the ELSA-Brasil Cohort Study
Source: PubMed Central journal article supplement (PMC6747529; doi:10.3390/ijerph16173025), 2019-08-21
Supplement: ijerph-16-03025-s001.pdf [file ijerph-16-03025-s001.pdf]

## Supplement Table

**Table 1.** - Association between ‘reward’ subscales and depressive episodes including prevalence ratio (PR), and 95% confidence interval.

| Scales                                         | Prev. (%) | Model 1 |           | Model 2 |           |
|------------------------------------------------|-----------|---------|-----------|---------|-----------|
|                                                |           | PR      | IC95%     | PR      | IC95%     |
| <b>Esteem</b>                                  |           |         |           |         |           |
| Quartile 1                                     | 8.80      | 3.27    | 2.43-4.13 | 3.08    | 2.36-4.03 |
| Quartile 2                                     | 5.15      | 1.85    | 1.39-2.48 | 1.79    | 1.34-2.41 |
| Quartile 3                                     | 3.29      | 1.18    | 0.87-1.60 | 1.23    | 0.91-1.66 |
| Quartile 4                                     | 2.52      | -       | -         | -       | -         |
| <b>Job Promotion</b>                           |           |         |           |         |           |
| Quartile 1                                     | 8.59      | 2.66    | 2.06-3.42 | 2.51    | 1.94-3.25 |
| Quartile 2                                     | 5.75      | 1.58    | 1.36-2.32 | 1.70    | 1.30-2.23 |
| Quartile 3                                     | 3.65      | 1.12    | 0.85-1.48 | 1.02    | 0.86-1.49 |
| Quartile 4                                     | 3.23      | -       | -         | 1.00    | -         |
| <b>Job Insecurity*</b><br>(Undesirable change) |           |         |           |         |           |
| Strongly agree                                 | 8.27      | 3.25    | 2.39-4.41 | 2.99    | 2.19-4.10 |
| Agree                                          | 4.89      | 1.92    | 1.42-2.59 | 1.81    | 1.33-2.47 |
| Disagree                                       | 3.36      | 1.32    | 0.91-1.91 | 1.32    | 0.91-1.92 |
| Strongly disagree                              | 2.54      | -       | -         | 1.00    | -         |

\* In this ERI subscale only one question of the two original “job insecurity” scale components was included: “I have experienced or I expect to experience an undesirable change in my work situation”. Model 1. Crude model; Model 2. Adjusted by age, gender, marital status, race/skin color, education.

**Table 2.** - Association between ‘effort’-‘reward’ imbalance and depressive episodes including prevalence ratio (PR) and respective 95% confidence intervals according to gender. ELSA-Brasil, 2012-2014.

| Scales                 | Men  |           | Women |           |
|------------------------|------|-----------|-------|-----------|
|                        | PR*  | IC95%     | PR*   | IC95%     |
| <b>Effort</b>          |      |           |       |           |
| Quartile 1             | 1.00 | --        | 1.00  | --        |
| Quartile 2             | 1.47 | 0.90-2.39 | 1.13  | 0.83-1.55 |
| Quartile 3             | 1.71 | 1.10-2.66 | 1.23  | 0.93-1.63 |
| Quartile 4             | 2.16 | 1.33-3.50 | 1.74  | 1.30-2.32 |
| <b>Reward</b>          |      |           |       |           |
| Quartile 1             | 4.20 | 2.32-7.59 | 3.19  | 2.25-4.50 |
| Quartile 2             | 2.07 | 1.07-4.02 | 1.49  | 1.00-2.23 |
| Quartile 3             | 1.67 | 0.85-3.26 | 1.45  | 0.96-2.18 |
| Quartile 4             | 1.00 | --        | 1.00  | --        |
| <b>Over-commitment</b> |      |           |       |           |
| Quartile 1             | 1.00 | --        | 1.00  | --        |
| Quartile 2             | 1.03 | 0.54-1.95 | 1.21  | 0.86-1.71 |
| Quartile 3             | 3.25 | 1.89-5.59 | 1.77  | 1.24-2.51 |
| Quartile 4             | 4.27 | 2.81-7.74 | 3.27  | 2.42-4.42 |
| <b>ER Ratio</b>        |      |           |       |           |
| Quartile 1             | 1.00 | --        | 1.00  | --        |
| Quartile 2             | 1.55 | 0.89-2.72 | 0.80  | 0.56-1.16 |
| Quartile 3             | 1.75 | 1.00-3.06 | 1.00  | 0.71-1.41 |
| Quartile 4             | 3.34 | 2.02-5.55 | 2.19  | 1.64-2.91 |

\* Model adjusted by age, marital status, race/skin color, education.
